# Supplementary material
Source: PubMed Central journal article supplement (PMC5607103)
Supplement: NIHMS897775-supplement-Supp_info.pdf [file NIHMS897775-supplement-Supp_info.pdf]

## **Supplementary Information**

### **The proteome and transcriptome of the infectious metacyclic form of *Trypanosoma brucei* define quiescent cells primed for mammalian invasion**

Romain Christiano, Nikolay G. Kolev, Huafang Shi, Elisabetta Ullu, Tobias C. Walther and Christian Tschudi

#### **Supplementary Figures**

**Figure S1.** Biological replicates correlation for the RNA-Seq data. RPKM (log10) values for procyclics (top) and metacyclics (bottom).

**Figure S2.** Incorporation efficiency for heavy lysine and arginine in the labeled procyclics.

**Figure S3.** Changes in protein abundance between light metacyclics and heavy procyclic trypanosomes.

**Figure S4.** Biological and technical replicates correlation between proteomic data sets.

**Figure S5.** Abundance distribution of proteins (left) and transcripts (right) in procyclics and metacyclics.

**Figure S6.** Large fraction of the total protein mass in the cell is accounted for by a small number of proteins in both procyclics and metacyclics.

**Figure S7. (A)** Comparison of differences in proteome and transcriptome changes between metacyclics and procyclics. **(B)** Correlation between protein and mRNA abundance in procyclics. **(C)** Correlation between protein and mRNA abundance in metacyclics. The RNA-Seq fold-change values used here were obtained by the DNASTAR analysis (see Experimental Procedures).

**Figure S8.** Similarities between MF and BSF transcriptomes and proteomes. **(A)** Correlation of changes in mRNA abundance between metacyclics and procyclics (this study) and between bloodstream form and procyclics (Siegel *et al.*, 2010). **(B)** Correlation of changes in protein abundance between metacyclics and procyclics (this study) and between bloodstream form and procyclics (Butter *et al.*, 2013).

**Figure S9.** Assignment of the serine phosphorylation site in VSG653 from tandem mass spectrometry data.

**Figure S10.** Genome browser view of examples at the end of a transcription unit with several genes showing great differences in mRNA levels.

### **Supplementary Tables**

**Table S1.** RNA-Seq RPKM and total raw counts for All Data.

**Table S2.** SILAC All Data.

**Table S3.** RNA-Seq top 200.

**Table S4.** SILAC top 200.

**Table S5.** DESeq2 All Data.

**Table S6.** DESeq2 DEG 2-fold changes.

**Table S7.** SILAC 2-fold changes.

**Table S8.** DESeq2 GO Analysis.

**Table S9.** SILAC GO Analysis.

**Table S10.** DNASTAR All Data.

**Table S11.** DNASTAR DEG 2-fold changes.

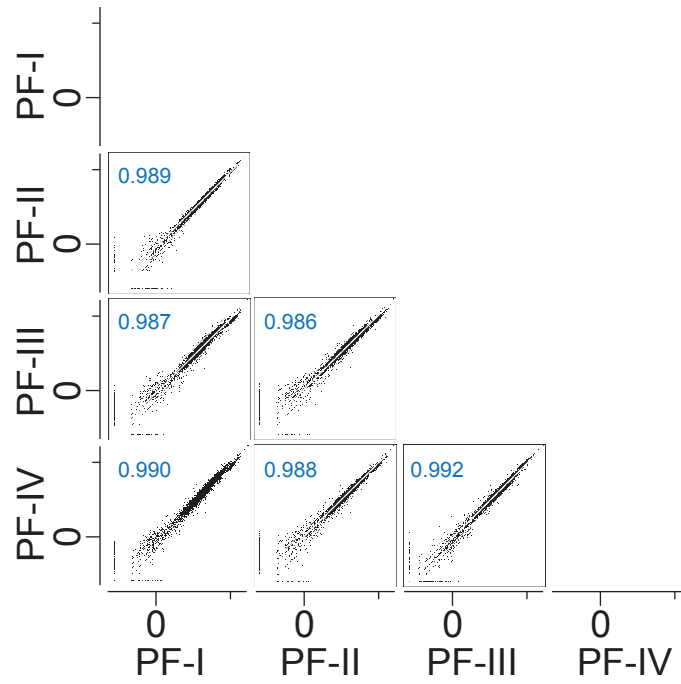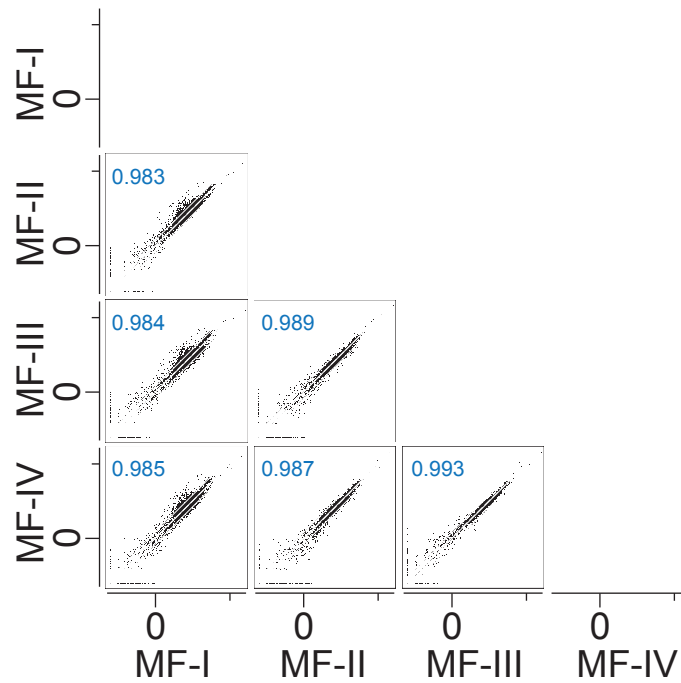

**Figure S1**

Biological replicates correlation for the RNA-Seq data. RPKM ( $\log_{10}$ ) values for procyclics (top) and metacyclics (bottom).

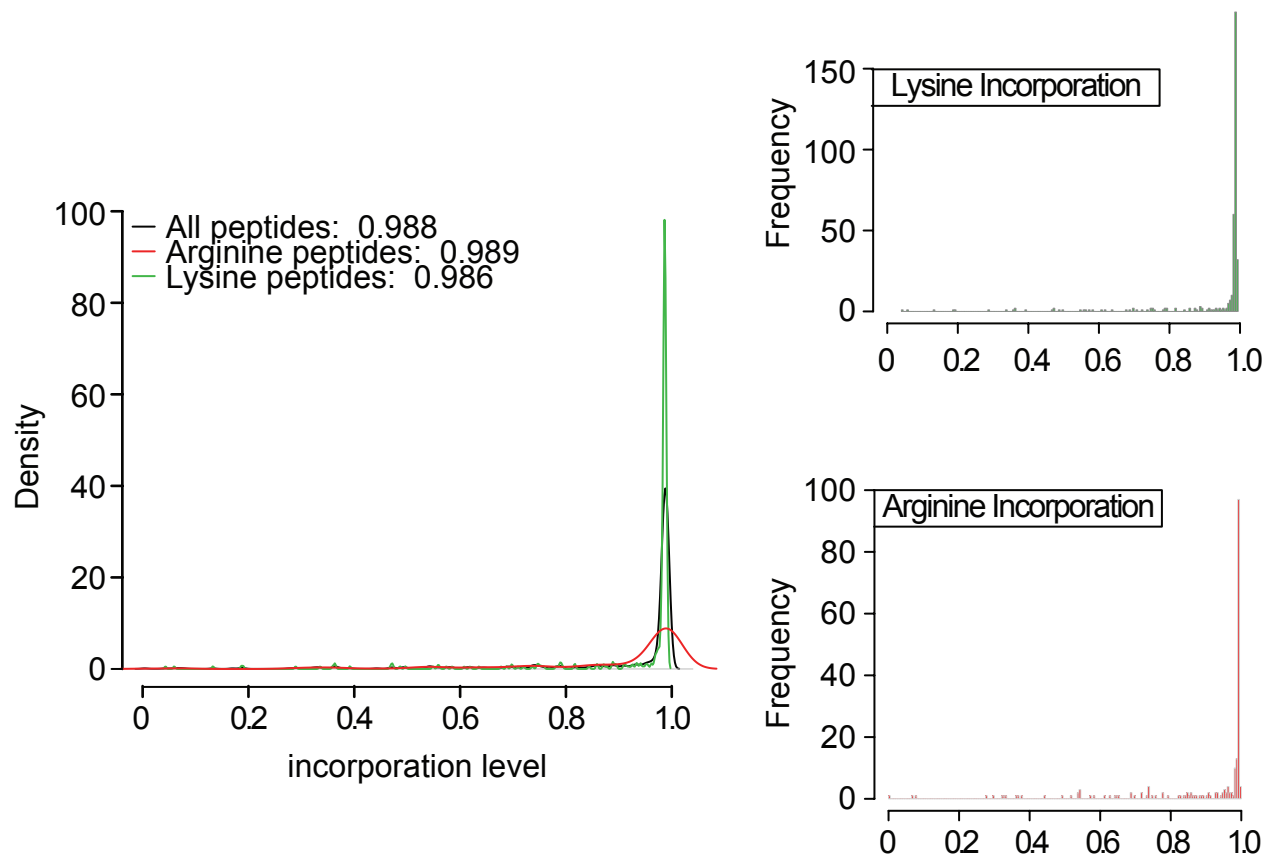

**Figure S2**

Incorporation efficiency for heavy lysine and arginine in the labeled procyclics.

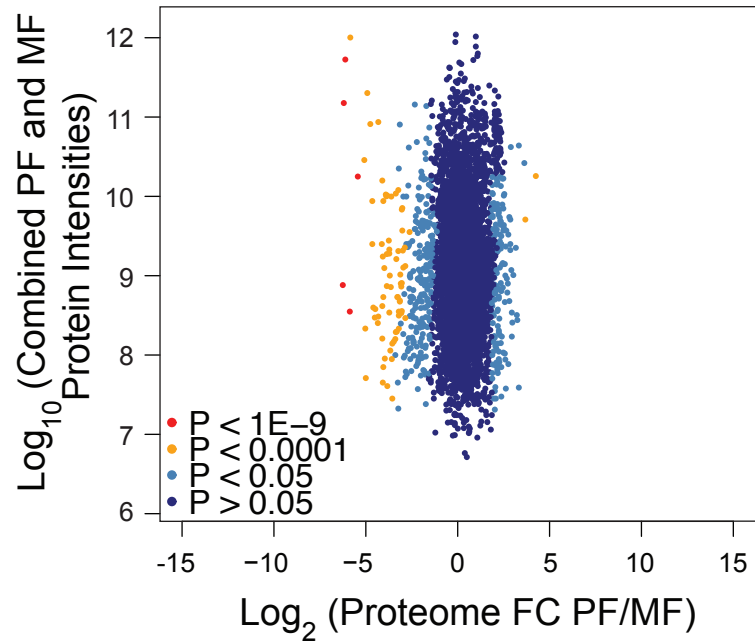

**Figure S3**

Changes in protein abundance between light metacyclics and heavy procyclic trypanosomes.

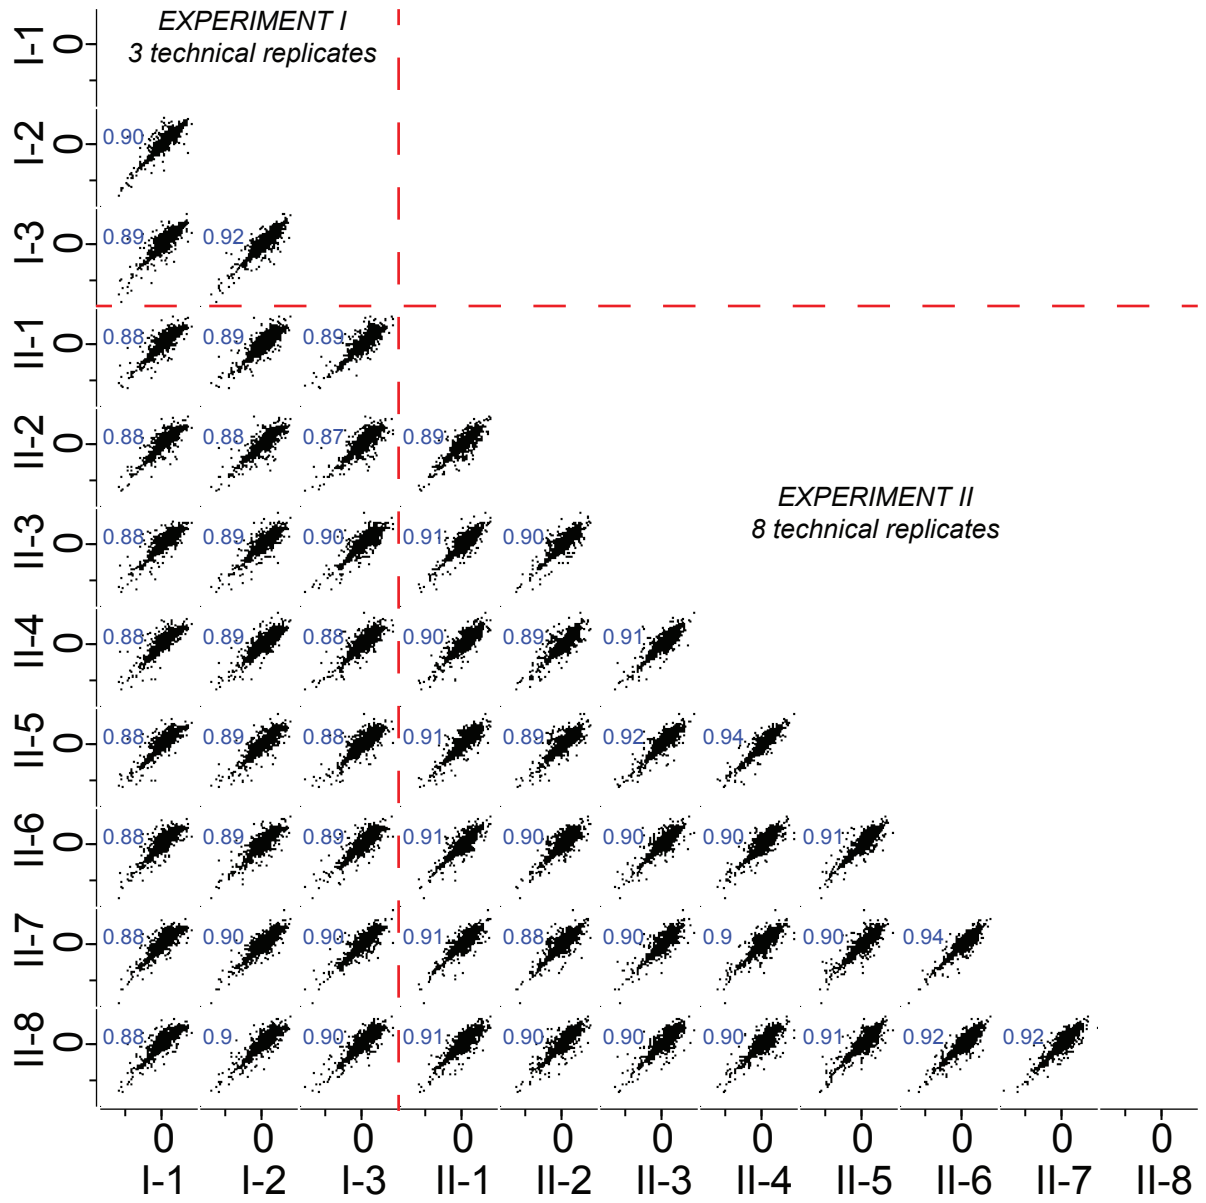

**Figure S4**

Biological and technical replicates correlation between proteomic data sets.

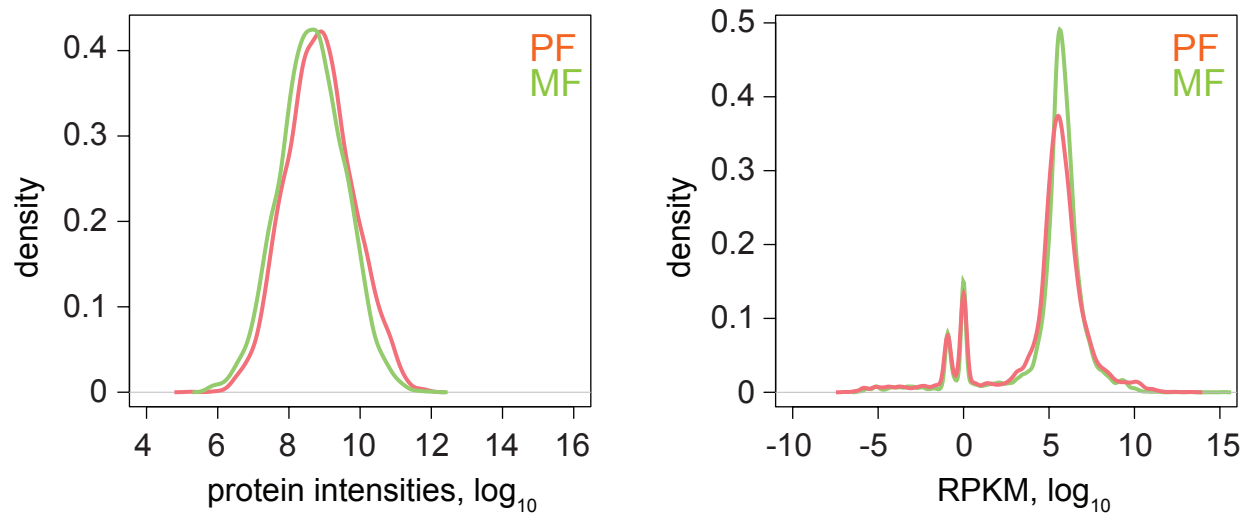

**Figure S5**

Abundance distribution of proteins (left) and transcripts (right) in procyclics and metacyclics.

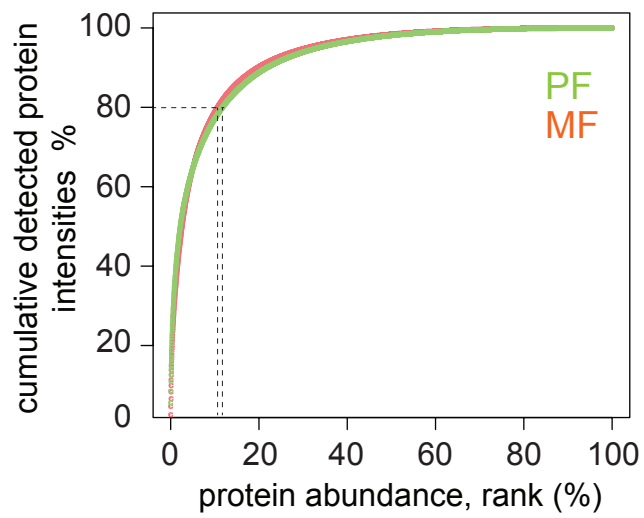

**Figure S6**

Large fraction of the total protein mass in the cell is accounted for by a small number of proteins in both procyclics and metacyclics.



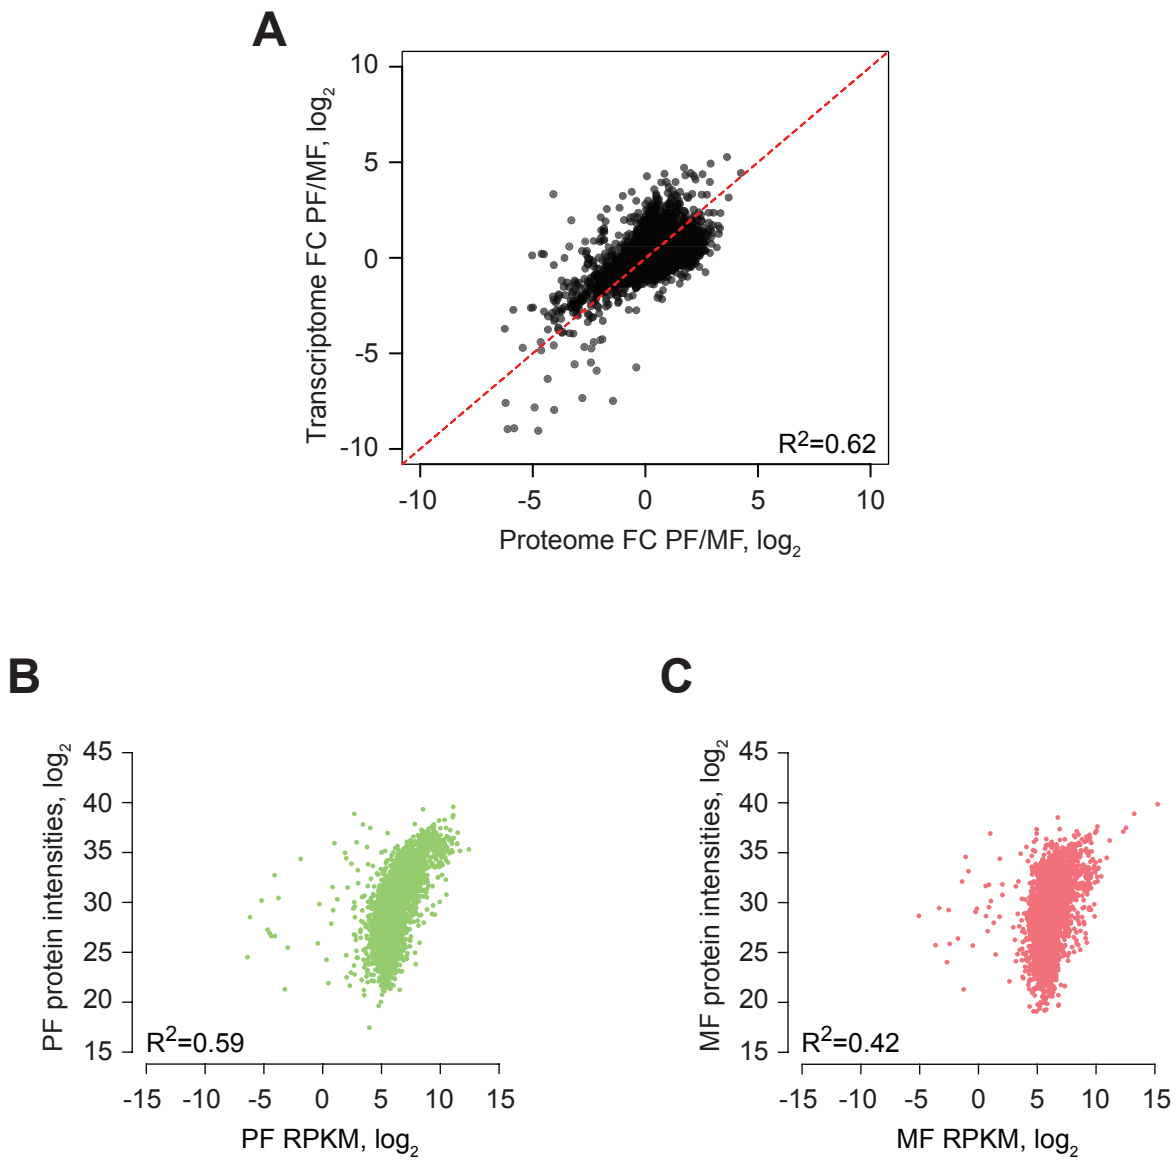

**Figure S7**

- (A) Comparison of differences in proteome and transcriptome changes between metacyclics and procyclics.
- (B) Correlation between protein and mRNA abundance in procyclics.
- (C) Correlation between protein and mRNA abundance in metacyclics.
- The RNA-Seq fold-change values used here were obtained by the DNASTAR analysis (see Experimental Procedures).

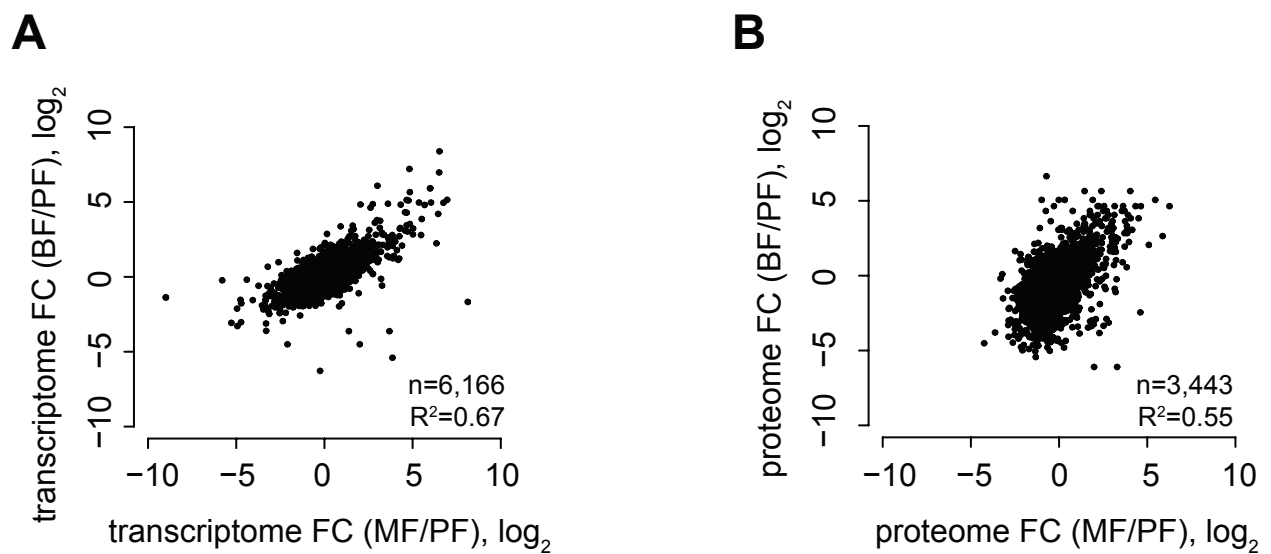

**Figure S8**

Similarities between MF and BF transcriptomes and proteomes. **(A)** Correlation of changes in mRNA abundance between metacyclics and procyclics (this study) and between bloodstream form and procyclics (Siegel et al., 2010). **(B)** Correlation of changes in protein abundance between metacyclics and procyclics (this study) and between bloodstream form and procyclics (Butter et al., 2013).

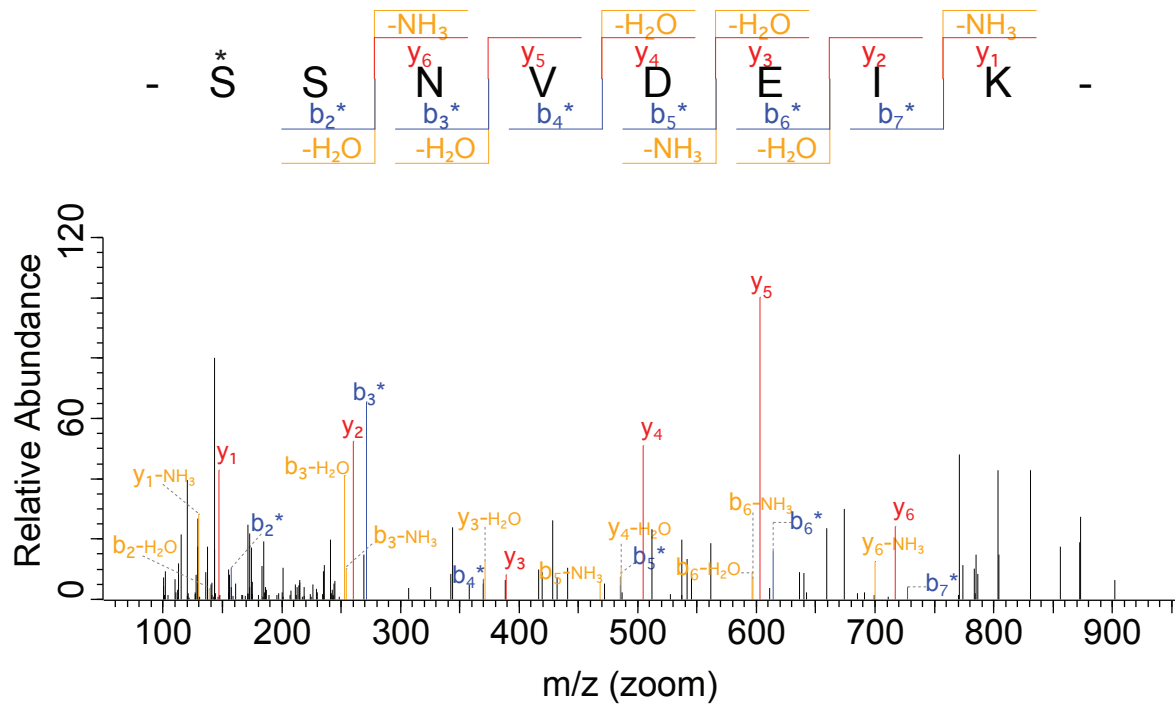

**Figure S9**

Assignment of the serine phosphorylation site in VSG653 from tandem mass spectrometry data.

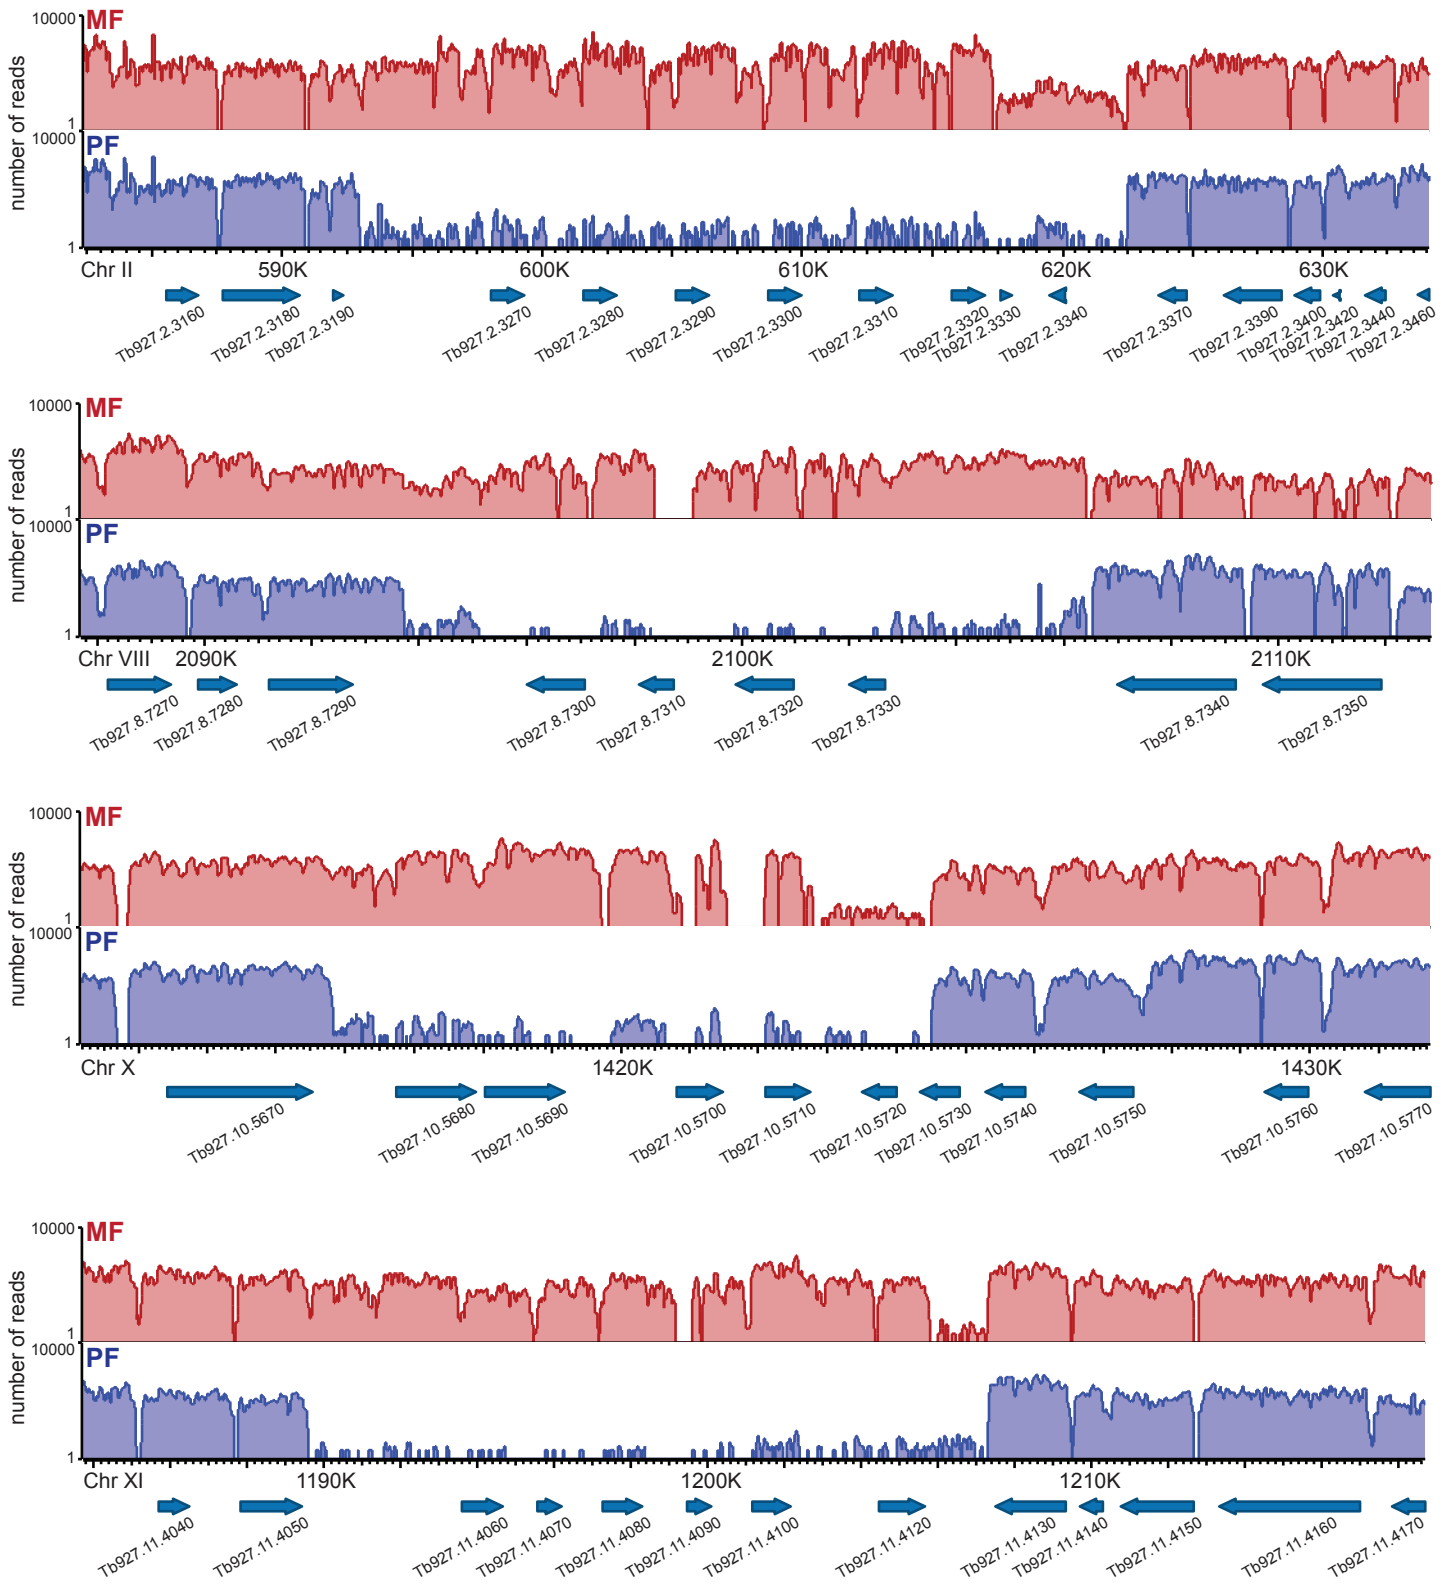

**Figure S10**

Genome browser view of examples at the end of a transcription unit with several genes showing great differences in mRNA levels.
